# Supplementary material for: Dielectric Barrier Discharge (DBD) Plasma Assisted Synthesis of Ag2O Nanomaterials and Ag2O/RuO2 Nanocomposites
Source: PubMed Central journal article supplement (PMC5302525; doi:10.3390/nano6030042), 2016-02-26
Supplement: nanomaterials-06-00042-s001.pdf [file nanomaterials-06-00042-s001.pdf]

# Supplementary Materials: Dielectric Barrier Discharge (DBD) Plasma Assisted Synthesis of $\text{Ag}_2\text{O}$ Nanomaterials and $\text{Ag}_2\text{O}/\text{RuO}_2$ Nanocomposites

Antony Ananth and Young Sun Mok\*

## 1. Characterization Results of the $\text{RuO}_2$ Nanomaterials (NMs)

Figure S1a,b show the optical and field emission scanning electron microscope (FESEM) images of the  $\text{RuO}_2$  NMs. The nanomaterials exhibited nanosheet morphology with length  $>1 \mu\text{m}$  and the width  $<100 \text{ nm}$ . The X-ray diffraction (XRD) spectrum (Figure S1c) showed the prominent peaks at the diffraction angle ( $2\theta$ )  $28.00^\circ$ ,  $34.93^\circ$ ,  $39.64^\circ$  and  $54.00^\circ$ , representing (110), (101), (200) and (211) set of lattice planes of rutile type  $\text{RuO}_2$  (JCPDS card No.88-0322). The Thermogravimetric analysis (TGA) thermogram of the  $\text{RuO}_2$  NMs (Figure S1d) showed the removal of oxygen in a gradual manner when increasing the temperature. Removal of the adsorbed water vapors until  $120^\circ\text{C}$ , followed by gradual decomposition of  $\text{RuO}_x$  into metallic Ru at higher temperature was noted. The samples initially contained 24.04 wt % (10.338 mg) oxygen and the oxygen loss amounted to 22.84 wt % (9.822 mg). Still it contained about 1.192 wt % oxygen at  $800^\circ\text{C}$ .

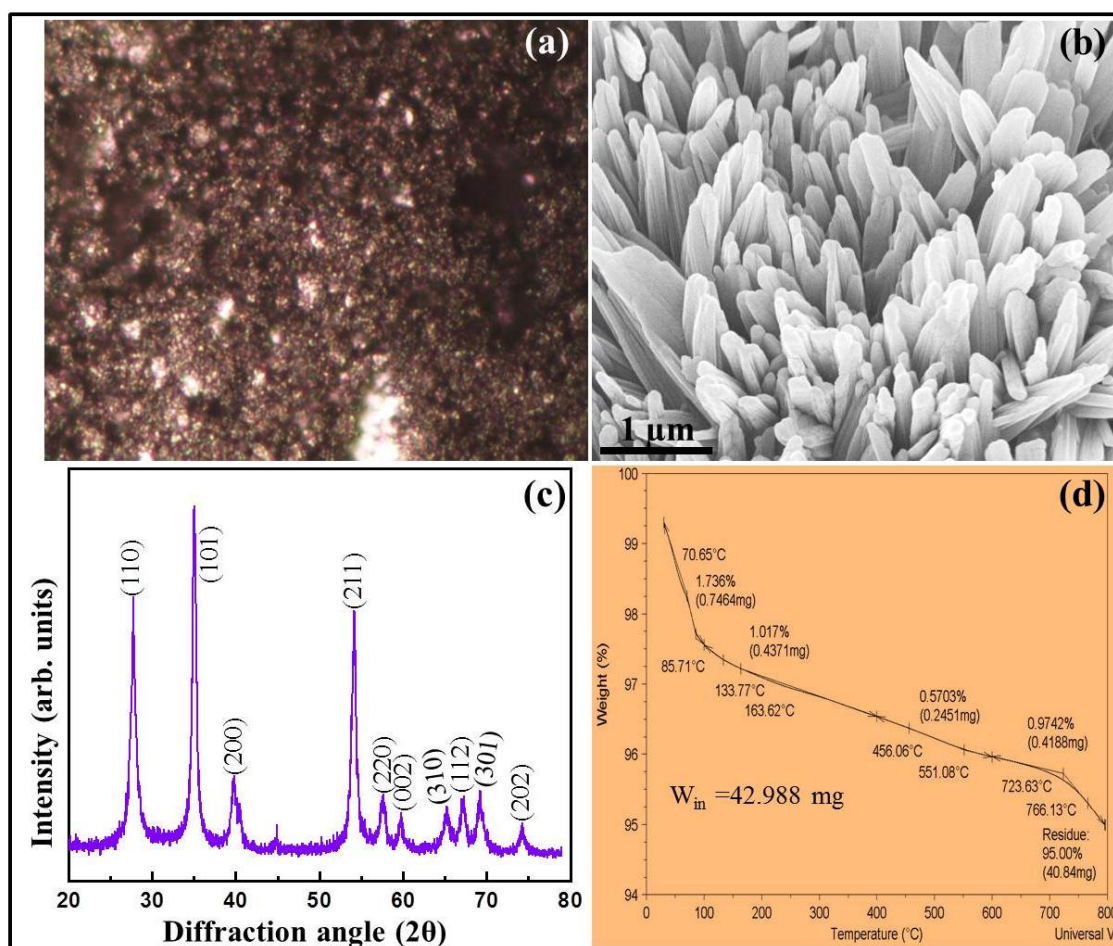

**Figure S1.** (a) Optical microscopic image at 100 times magnification; (b) The field emission scanning electron microscope (FESEM) image; (c) X-ray diffractogram; and (d) Thermogravimetric analysis (TGA) thermogram of  $\text{RuO}_2$  Nanomaterials (NMs).

## 2. DBD Plasma Reactor Setup

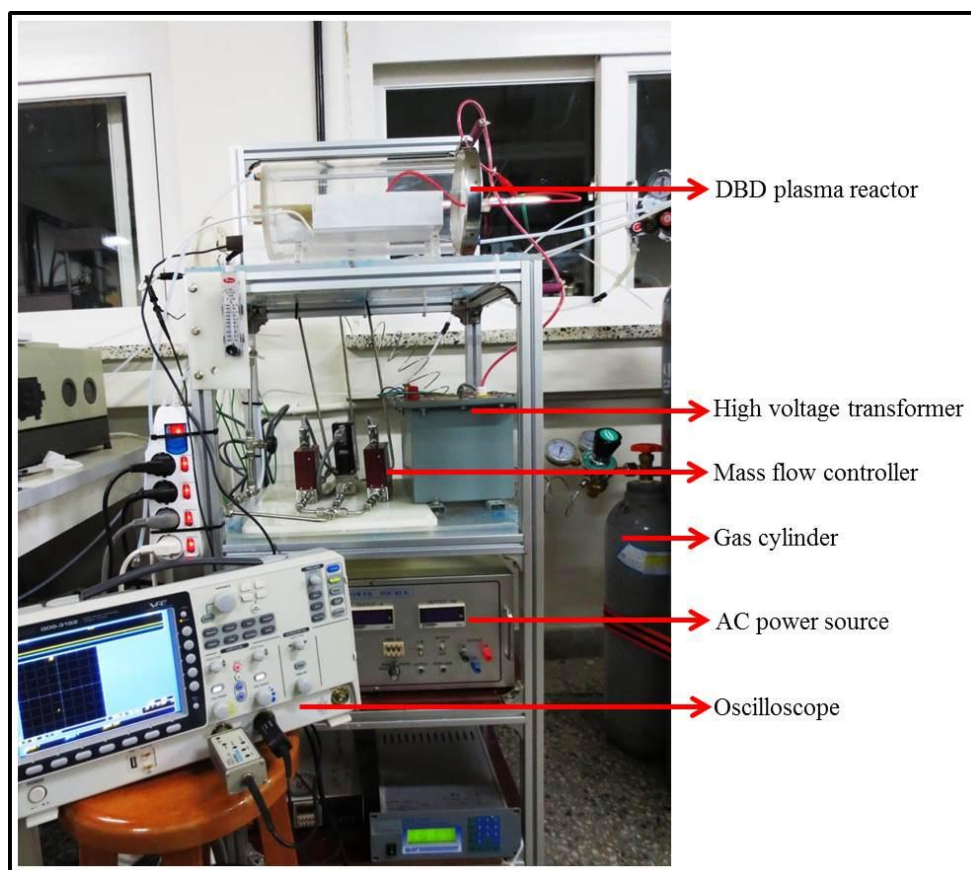

**Figure S2.** Photographic image of the Dielectric Barrier Discharge (DBD) plasma reactor.

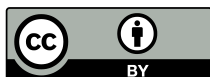

© 2016 by the authors; licensee MDPI, Basel, Switzerland. This article is an open access article distributed under the terms and conditions of the Creative Commons by Attribution (CC-BY) license (<http://creativecommons.org/licenses/by/4.0/>).
